# Supplementary material for: A homozygous R148W mutation in Semaphorin 7A causes progressive familial intrahepatic cholestasis
Source: PubMed Central journal article supplement (PMC8573601; doi:10.15252/emmm.202114563), 2021-09-29
Supplement: EMMM-13-e14563-s004.pdf [file EMMM-13-e14563-s004.pdf]

## Table of contents

| Content                                                                                                                                                   | Page |
|-----------------------------------------------------------------------------------------------------------------------------------------------------------|------|
| <b>Appendix Figures. S1-3 and Appendix Tables. S1-18</b>                                                                                                  |      |
| <b>Appendix Figure S1.</b> Abdominal MRI (Patient IV.4) reveals normal liver size and parenchyma without any biliary tract obstruction and abnormalities. | 3    |
| <b>Appendix Figure S2.</b> Identification of c.C800T mutation in <i>SLC10A1</i> in the studied family.                                                    | 4    |
| <b>Appendix Figure S3.</b> Genomic organization of <i>SEMA7A</i> and mutation location.                                                                   | 5    |
| <b>Appendix Table S1.</b> Clinical features of the child patient and her nuclear families                                                                 | 6    |
| <b>Appendix Table S2.</b> Serum biochemistry of <i>Slc10a1</i> <sup>S267F</sup> mutant mice (8-week-old)                                                  | 7    |
| <b>Appendix Table S3.</b> Clinical features of the child patient's family members.                                                                        | 8    |
| <b>Appendix Table S4.</b> The autoantibody profile in family members.                                                                                     | 11   |
| <b>Appendix Table S5.</b> Blood viral hepatitis tests in family members.                                                                                  | 12   |
| <b>Appendix Table S6.</b> Biomarkers of liver fibrosis in family members.                                                                                 | 13   |
| <b>Appendix Table S7.</b> $\alpha$ 1-antitrypsin and CER tests in the child patient.                                                                      | 13   |
| <b>Appendix Table S8.</b> Blood lipid tests in family members.                                                                                            | 13   |
| <b>Appendix Table S9.</b> Variant filtering based on recessive inheritance model.                                                                         | 14   |
| <b>Appendix Table S10.</b> Variant analysis based on recessive inheritance model.                                                                         | 15   |
| <b>Appendix Table S11.</b> Variant filtering based on compound heterozygous inheritance model.                                                            | 16   |
| <b>Appendix Table S12.</b> Variant analysis based on compound heterozygous inheritance model.                                                             | 17   |
| <b>Appendix Table S13.</b> Variant filtering based on De novo model                                                                                       | 18   |

|                                                                                                                    |    |
|--------------------------------------------------------------------------------------------------------------------|----|
| <b>Appendix Table S14.</b> Variant filtering based on dominant inheritance model.                                  | 19 |
| <b>Appendix Table S15.</b> Serum biochemistry of <i>Sema7a</i> <sup>R145W</sup> mutant mice (4-week-old).          | 20 |
| <b>Appendix Table S16.</b> LC-MS/MS analysis of bile acids in <i>Sema7a</i> <sup>R145W</sup> mutant mouse livers   | 21 |
| <b>Appendix Table S17.</b> Real time qPCR probes (TaqMan) and primers (SYBR).                                      | 22 |
| <b>Appendix Table S18.</b> Antibodies used in western blot, immunohistochemistry and multiplex immunofluorescence. | 23 |

---

## Appendix Figures.S1-3 and their Figure legends

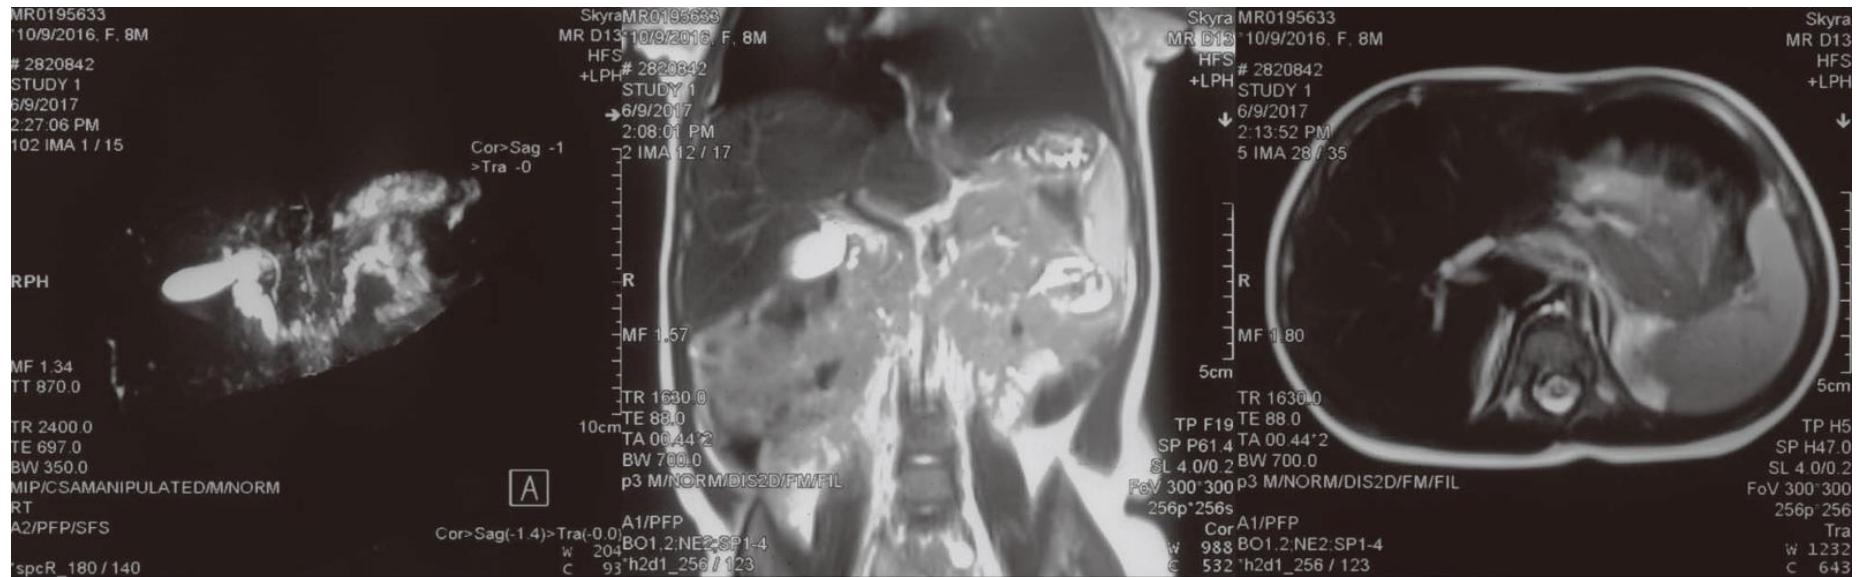

**Appendix Figure S1.** Abdominal MRI (Patient IV.4) reveals normal liver size and parenchyma without any biliary tract obstruction and abnormalities.

### Verification of c.C800T mutation in *SLC10A1*

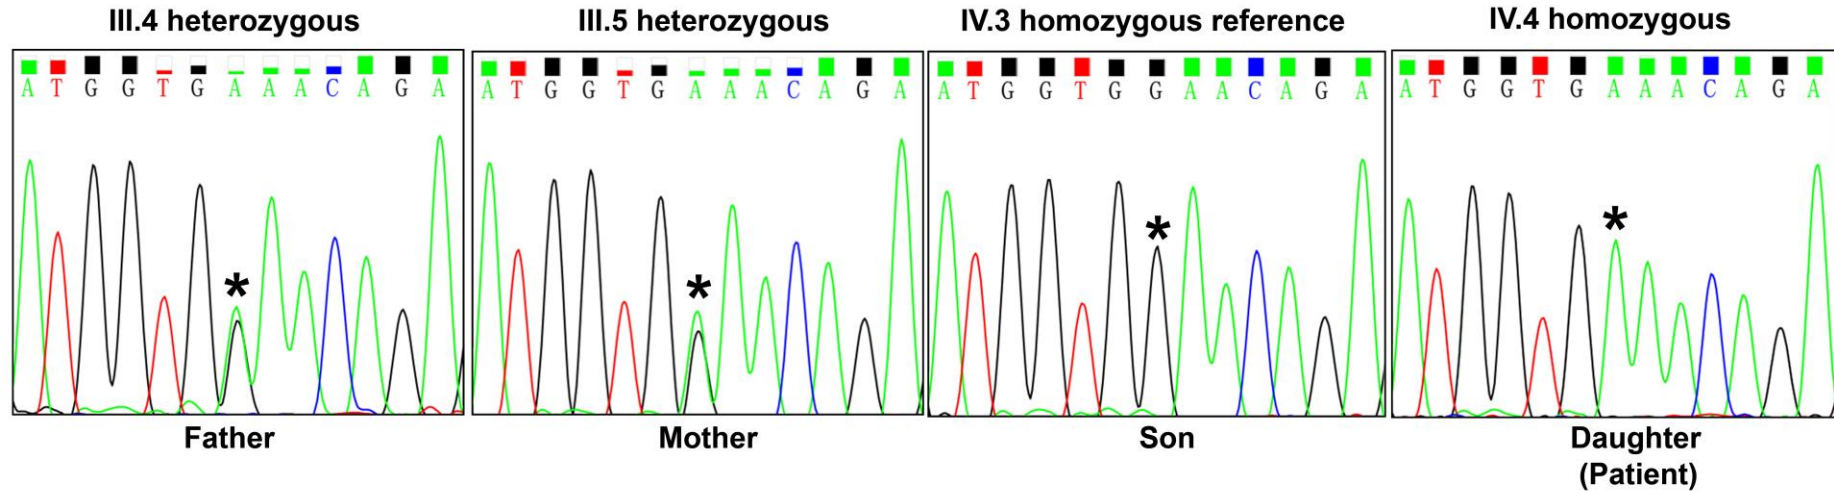

**Appendix Figure S2.** Identification of c.C800T mutation in *SLC10A1* in the studied family. Sanger DNA sequencing demonstrated that *SLC10A1* mutation was homozygous in the child patient (Patient IV.4). Her nuclear family members were homozygous reference or heterozygous for the mutation. The variable nucleotide(s) is specified (\*).

### Homozygous c.C442T (p.R148W) mutation in *SEMA7A*

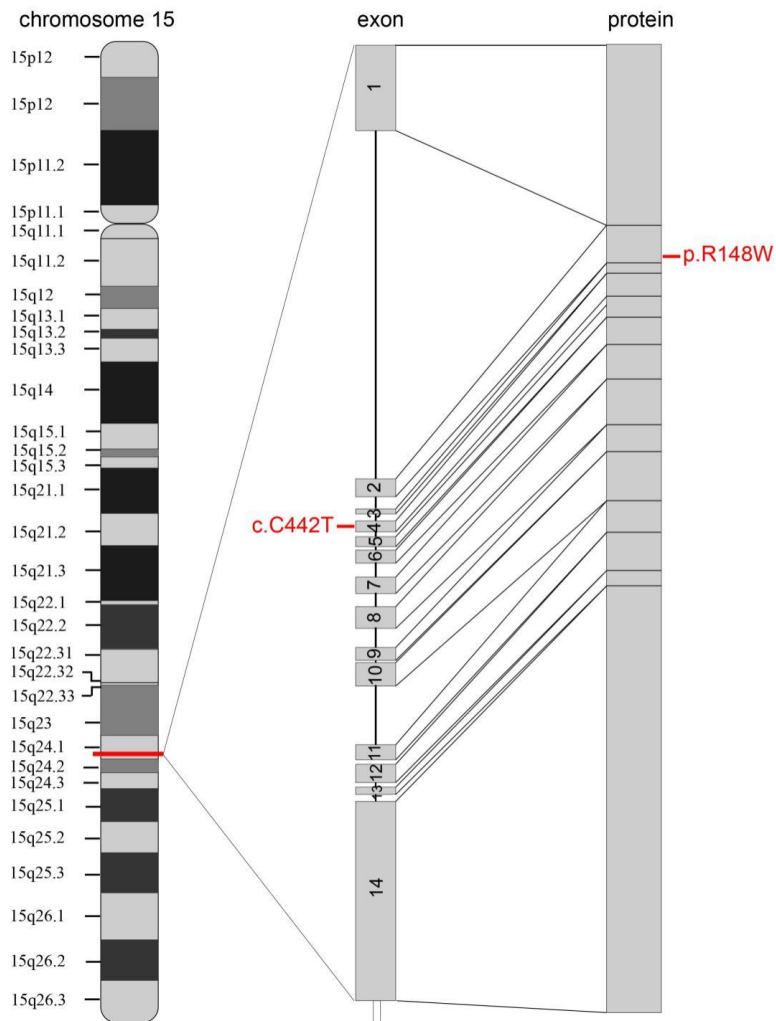

**Appendix Figure S3.** Genomic organization of *SEMA7A* and mutation location.

Genomic organization of *SEMA7A* and the DNA and protein variants were identified in the patient IV.4 from the studied family.

## Appendix Tables. S1-18

**Appendix Table S1. Clinical features of the child patient and her nuclear families**

| Family members parameters  |                    | Patient (IV.4) |               | Father (III.4) | Mother (III.5) | Brother (IV.3) |
|----------------------------|--------------------|----------------|---------------|----------------|----------------|----------------|
| Sex, age                   |                    | F, 2m          | 5m            | M, 32y         | F, 29y         | M, 3y          |
| Neurocognitive impairment  |                    | -              | -             | -              | -              | -              |
| Hypotonia                  |                    | -              | -             | -              | -              | -              |
| Growth retardation         |                    | -              | -             | -              | -              | -              |
| Serum biochemistry         | Ref.               | Patient-Test1  | Patient-Test2 | Father         | Mother         | Brother        |
| ALT (IU/L)                 | 0-40               | 40.0           | 61.8          | 26.5           | 17.4           | 13.1           |
| AST (IU/L)                 | 0-37               | 76.0           | 146.9         | 23.9           | 20.3           | 24.3           |
| GGT (IU/L)                 | 4-50               | N.D.           | 20.0          | 27.0           | 10.0           | 14.0           |
| ALP (IU/L)                 | 40-160 (Child<350) | N.D.           | 260.0         | 145.0          | 94.0           | N.D.           |
| ALB (g/L)                  | 38-51              | 41.4           | N.D.          | N.D.           | N.D.           | N.D.           |
| TBIL ( $\mu\text{mol/l}$ ) | 6-21               | 10.2           | 4.7           | 11.0           | 6.9            | 5.1            |
| DBIL ( $\mu\text{mol/l}$ ) | 0-6                | 2.6            | 1.8           | 2.4            | 3.1            | 2.4            |
| TBA ( $\mu\text{mol/l}$ )  | 0-10               | 154.1          | 101.4         | 4.3            | 2.9            | 1.9            |

**Abbreviations:** F, Female; M, Male; ALT, alanine aminotransferase; AST, aspartate aminotransferase; GGT, gamma-glutamyl transferase; ALP, alkaline phosphatase; ALB, albumin; TBIL, total bilirubin; DBIL, direct bilirubin; TBA, total bile acids.

**Notes:** N.D., not detected; “-” denotes negative.

**Appendix Table S2. Serum biochemistry of *Slc10a1*<sup>S267F</sup> mutant mice (8-week-old)**

|                               | <b>Wild type<br/>(n = 4)</b> | <b>Heterozygote<br/>(n = 4)</b> | <b>Homozygote<br/>(n = 7)</b> |
|-------------------------------|------------------------------|---------------------------------|-------------------------------|
| <b>Gender (Male / Female)</b> | 2/2                          | 2/2                             | 3/4                           |
| <b>Serum ALT (IU/L)</b>       | 22.98±8.71                   | 37.18±19.65                     | 29.95±7.89                    |
| <b>Serum AST (IU/L)</b>       | 76.54±13.33                  | 81.60±20.74                     | 75.15±22.04                   |
| <b>Serum ALP (IU/L)</b>       | 47.36±14.71                  | 34.56±6.09                      | 30.35±8.67                    |
| <b>Serum TBA (μmol/L)</b>     | 2.65±3.64                    | 2.33±1.52                       | 3.06±1.78                     |
| <b>Serum TBIL (μmol/L)</b>    | 5.00±0.80                    | 7.30±4.14                       | 6.55±2.44                     |
| <b>Serum DBIL (μmol/L)</b>    | 2.66±0.94                    | 5.66±3.37                       | 4.75±2.61                     |

**Notes:** Values are mean ± SD. The data were analyzed by the independent-samples Student's *t*-test.

**Abbreviations:** ALT, alanine aminotransferase; AST, aspartate aminotransferase; ALP, alkaline phosphatase; TBA, total bile acids; TBIL, total bilirubin; DBIL, direct bilirubin.

**Appendix Table S3. Clinical features of the child patient's family members**

| Family members |               | Serum biochemistry indexes |               |               |               |              |                        |                        |                       |
|----------------|---------------|----------------------------|---------------|---------------|---------------|--------------|------------------------|------------------------|-----------------------|
|                |               | ALT<br>(IU/L)              | AST<br>(IU/L) | GGT<br>(IU/L) | ALP<br>(IU/L) | ALB<br>(g/L) | TBIL<br>( $\mu$ mol/l) | DBIL<br>( $\mu$ mol/l) | TBA<br>( $\mu$ mol/l) |
| Ref.           |               | 0-40                       | 0-37          | 4-50          | 40-160        | 38-51        | 6-21                   | 0-6                    | 0-10                  |
| <b>I-1</b>     | <b>M, 89y</b> | 10.9                       | 37.8          | N.D.          | 152.0         | 54.8         | 14.4                   | 1.5                    | 5.7                   |
| <b>II-1</b>    | <b>M, 63y</b> | 11.2                       | 21.7          | N.D.          | 81.0          | 42.7         | 12.2                   | 2.8                    | 11.0                  |
| <b>II-2</b>    | <b>F, 63y</b> | 16.0                       | 22.0          | N.D.          | N.D.          | 70.9         | 8.4                    | 1.9                    | 2.4                   |
| <b>II-3</b>    | <b>M, 55y</b> | 34.9                       | 40.0          | N.D.          | 126.0         | 63.5         | 14.6                   | 6.0                    | 2.4                   |
| <b>II-4</b>    | <b>F, 54y</b> | 23.1                       | 31.3          | N.D.          | 179.0         | 60.7         | 13.4                   | 0.6                    | 2.9                   |
| <b>II-5</b>    | <b>M, 53y</b> | 28.8                       | 31.4          | N.D.          | 142.0         | 62.1         | 20.3                   | 6.9                    | 2.0                   |
| <b>II-6</b>    | <b>F, 52y</b> | 24.6                       | 26.9          | N.D.          | 77.0          | 48.1         | 17.0                   | 2.9                    | 6.5                   |



---

|                          |               |      |      |      |       |      |      |     |      |
|--------------------------|---------------|------|------|------|-------|------|------|-----|------|
| <b>II-7*</b>             | <b>M, 51y</b> | 79.8 | 63.2 | N.D. | 170.0 | 68.4 | 16.7 | 3.8 | 1.9  |
| <b>II-8</b>              | <b>F, 53y</b> | 27.3 | 28.8 | N.D. | 74.0  | 53.4 | 11.5 | 2.5 | 3.2  |
| <b>II-9</b>              | <b>F, 49y</b> | 16.7 | 27.6 | N.D. | 84.0  | 48.4 | 11.1 | 2.2 | 1.3  |
| <b>II-10</b>             | <b>M, 48y</b> | 33.1 | 26.8 | N.D. | 133.0 | 53.2 | 13.4 | 1.4 | 1.5  |
| <b>III-1</b>             | <b>M, 34y</b> | 7.4  | 25.8 | N.D. | 96.0  | 52.4 | 13.5 | 3.0 | 6.1  |
| <b>III-2</b>             | <b>F, 34y</b> | 8.2  | 20.8 | N.D. | 100.0 | 44.5 | 11.2 | 3.5 | 14.3 |
| <b>III-3</b>             | <b>F, 32y</b> | 25.3 | 30.3 | N.D. | 122.0 | 67.8 | 15.4 | 4.8 | 1.9  |
| <b>III-6</b>             | <b>M, 31y</b> | 29.5 | 30.4 | N.D. | 53.5  | 10.4 | 1.8  | 8.6 | 7.9  |
| <b>III-7</b>             | <b>M, 33y</b> | 23.4 | 28.4 | N.D. | 129.0 | 59.1 | 15.5 | 3.2 | 1.8  |
| <b>III-8</b>             | <b>M, 32y</b> | 26.5 | 34.9 | N.D. | 103.0 | 61.4 | 10.8 | 2.6 | 4.6  |
| <b>III-9<sup>#</sup></b> | <b>M, 28y</b> | 68.4 | 45.2 | N.D. | 115.0 | 63.6 | 14.1 | 3.2 | 3.4  |

---

|               |               |      |      |      |      |      |      |      |      |
|---------------|---------------|------|------|------|------|------|------|------|------|
| <b>III-10</b> | <b>M, 24y</b> | N.D. | N.D. | N.D. | N.D. | N.D. | N.D. | N.D. | N.D. |
| <b>IV-1</b>   | <b>M, 8y</b>  | 10.2 | 12.1 | N.D. | N.D. | 49.0 | 7.7  | 1.6  | 2.2  |
| <b>IV-2</b>   | <b>M, 4y</b>  | 22.1 | 24.9 | N.D. | N.D. | 39.9 | 8.6  | 4.3  | 3.8  |

**Abbreviations:** F, Female; M, Male; ALT, alanine aminotransferase; AST, aspartate aminotransferase; GGT, gamma-glutamyl transferase; ALP, alkaline phosphatase; ALB, albumin; TBA, total bile acids; TBIL, total bilirubin; DBIL, direct bilirubin; N.D., not detected.

**Notes:** \*HBV patient; # NASH patient

**Appendix Table S4. The autoantibody profile in family members**

|                    | Family members |                |
|--------------------|----------------|----------------|
|                    | Patient IV.4   | IV.3 (Brother) |
| U1RNP              | -              | -              |
| Anti-Sm            | -              | -              |
| SSA                | -              | -              |
| Ro-52              | -              | -              |
| SSB                | -              | -              |
| Scl-70             | -              | -              |
| PM-Scl             | -              | -              |
| Jo-1               | -              | -              |
| CENP               | -              | -              |
| PCNA               | -              | -              |
| ds-DNA             | -              | -              |
| Nucleosome         | -              | -              |
| Histone            | -              | -              |
| Ribosome P protein | -              | -              |
| AMA type M2        | -              | -              |

**Abbreviations:** U1RNP, U1 ribonucleoprotein; Anti-Sm, Anti-Smith; SSA, Sjogren's Syndrome A; Ro-52, 52 kDa Ro protein; SSB, Sjogren's Syndrome B; Scl-70, Scleroderma-70; PM-Scl, polymyositis-Scleroderma; CENP, Centromere Protein; PCNA, Proliferating Cell Nuclear Antigen; ds-DNA, double stranded deoxyribonucleic acid; AMA, anti-mitochondrial antibody.

**Notes:** “-” denotes negative.

**Appendix Table S5. Blood viral hepatitis tests in family members**

|              | Family members |                |
|--------------|----------------|----------------|
|              | Patient IV.4   | IV.3 (Brother) |
| HAV IgM      | -              | -              |
| HBsAg        | -              | -              |
| HBsAb        | +              | +              |
| HBeAb        | -              | -              |
| HBeAg        | -              | -              |
| HBcAb        | -              | -              |
| HBc IgM      | -              | -              |
| HCV Ab       | -              | -              |
| EBV Antibody | -              | -              |
| CMV Antibody | -              | -              |

**Abbreviations:** HAV IgM, hepatitis A IgM; HBsAg, hepatitis B surface antigen; HBsAb, hepatitis B surface antibody; HBeAb, hepatitis B e antibody; HBeAg, hepatitis B e antigen; HBcAb, hepatitis B core antibody; HBc IgM, anti-hepatitis B core IgM; HCV Ab, hepatitis C virus antibody; EBV, Epstein-Barr virus; CMV, cytomegalovirus;

**Notes:** “+” denotes positive; “-” denotes negative.

**Appendix Table S6. Biomarkers of liver fibrosis in family members**

| Biomarkers                   | Family members |              |                |
|------------------------------|----------------|--------------|----------------|
|                              | Ref.           | Patient IV.4 | IV.3 (Brother) |
| Hyaluronic acid (ng/ml)      | 0-100          | 50.0         | 50.0           |
| Procollagen type III (ng/ml) | 0.021-30       | 45.5         | 36.4           |
| Type IV collagen (ng/ml)     | 0.021-30       | 39.3         | 18.0           |
| Laminin (ng/ml)              | 0.021-30       | 20.0         | 20.0           |

**Appendix Table S7.  $\alpha$ 1-antitrypsin and CER tests in the child patient**

| Biomarkers                     | The child patient |              |
|--------------------------------|-------------------|--------------|
|                                | Ref.              | Patient IV.4 |
| $\alpha$ 1-antitrypsin (mg/dl) | 88-174            | 108.0        |
| Ceruloplasmin (CER) (mg/dl)    | 21-53             | 20.3         |

**Appendix Table S8. Blood lipid tests in family members**

| Biomarkers     | Family members |              |                |
|----------------|----------------|--------------|----------------|
|                | Ref.           | Patient IV.4 | IV.3 (Brother) |
| TG (mmol/L)    | 0.40-1.70      | 1.11         | 1.14           |
| Tch (mmol/L)   | 3.00-5.20      | 3.85         | 3.45           |
| LDL-c (mmol/L) | 1.62-3.36      | 2.03         | 1.94           |
| HDL-c (mmol/L) | 0.91-1.55      | 1.33         | 1.11           |

**Abbreviations:** TG, triglycerides; Tch, total cholesterol; LDL-c, Cholesterol LDL; HDL-c, High-density lipoprotein.

**Appendix Table S9. Variant filtering based on recessive inheritance model**

| Steps for filtering variants                                                                                                                                                                                                                          | The nuclear family<br>(III.4, III.5, IV.3, and Patient IV.4) |
|-------------------------------------------------------------------------------------------------------------------------------------------------------------------------------------------------------------------------------------------------------|--------------------------------------------------------------|
| Total number of SNPs/Indels after quality control and coverage.                                                                                                                                                                                       | 4.88 million                                                 |
| Number of SNPs/Indels for model.                                                                                                                                                                                                                      | 155 053                                                      |
| Number of non-synonymous or frameshift (deletion/insertion) SNPs/Indels in exons or splicing sites.                                                                                                                                                   | 384                                                          |
| Rare (1) non-synonymous or frameshift (deletion/insertion) SNPs/Indels in exons or splicing sites.                                                                                                                                                    | 1<br>(SEMA7A)                                                |
| Rare (1) non-synonymous or frameshift (deletion/insertion) SNPs/Indels in exons or splicing sites were predicted as “damaging” with PolyPhen-2 (Adzhubei <i>et al</i> , 2010) or “disease-causing” with MutationTaster (Schwarz <i>et al</i> , 2014). | 1<br>(SEMA7A)                                                |

**Notes:** (1) The minor allele frequency (MAF) of rare variant less than 0.01 (1%) (Merico *et al*, 2015). MAF sourced from the Asian cohort in Exome Aggregation Consortium (ExAC) database (Lek *et al*, 2016) and/or 1000 Genomes database (Abecasis *et al*, 2010). Human genome assembly used in this analysis was Genome Reference Consortium GRCh37(hg19).

**Appendix Table S10. Variant analysis based on recessive inheritance model**

| Gene                       | Variant (type)      | Mouse Model (phenotype) <sup>a</sup> | Human disease (OMIM) <sup>b</sup> | Clinical significance (ClinVar database) <sup>c</sup> | Reference                                                                                                                        |
|----------------------------|---------------------|--------------------------------------|-----------------------------------|-------------------------------------------------------|----------------------------------------------------------------------------------------------------------------------------------|
| <i>SEMA7A</i><br>NM_003612 | c.C442T<br>missense | no                                   | no                                | no                                                    | <i>SEMA7A</i> serves as an effect or molecule in T-cell-mediated inflammation (Alto & Terman, 2017; Suzuki <i>et al</i> , 2007). |

**Notes:** <sup>a</sup> Mouse model sourced from <http://www.informatics.jax.org/>

<sup>b</sup> OMIM, online Mendelian inheritance in man, <https://www.ncbi.nlm.nih.gov/omim>

<sup>c</sup> ClinVar database, <https://www.ncbi.nlm.nih.gov/clinvar/>

Human genome assembly used in this analysis was Genome Reference Consortium GRCh37(hg19).

**Appendix Table S11. Variant filtering based on compound heterozygous inheritance model**

| Steps for filtering variants                                                                                                                                                                                                                                                                                    | The nuclear family<br>(III.4, III.5, IV.3, and Patient IV.4) |
|-----------------------------------------------------------------------------------------------------------------------------------------------------------------------------------------------------------------------------------------------------------------------------------------------------------------|--------------------------------------------------------------|
| Total number of SNPs/Indels after quality control and coverage.                                                                                                                                                                                                                                                 | 4.88 million                                                 |
| Number of SNPs/Indels for model.                                                                                                                                                                                                                                                                                | 17 308                                                       |
| Number of non-synonymous or frameshift (deletion/insertion) SNPs/Indels in exons or splicing sites.                                                                                                                                                                                                             | 405                                                          |
| Rare (1) non-synonymous or frameshift (deletion/insertion) SNPs/Indels in exons or splicing sites.                                                                                                                                                                                                              | 33                                                           |
| Rare (1) non-synonymous or frameshift (deletion/insertion) SNPs/indels in exons or splicing sites,<br>and at least one SNPs/Indels were predicted as “damaging” with PolyPhen-2 ( <a href="#">Adzhubei et al., 2010</a> )<br>or “disease-causing” with MutationTaster ( <a href="#">Schwarz et al., 2014</a> ). | 2<br>( <i>CC2D2B</i> )                                       |

**Notes:** (1) The minor allele frequency (MAF) of rare variant less than 0.05 (5%) ([Merico et al., 2015](#)). MAF sourced from the Asian cohort in Exome Aggregation Consortium (ExAC) database ([Lek et al., 2016](#)) and/or 1000 Genomes database ([Abecasis et al., 2010](#)) Human genome assembly used in this analysis was Genome Reference Consortium GRCh37(hg19).



**Appendix Table S12. Variant analysis based on compound heterozygous inheritance model**

| Gene                          | Variant (type)      | Mouse Model (phenotype) <sup>a</sup> | Human disease (OMIM) <sup>b</sup> | Clinical significance (ClinVar database) <sup>c</sup> | Reference                                                                                                                                                                           |
|-------------------------------|---------------------|--------------------------------------|-----------------------------------|-------------------------------------------------------|-------------------------------------------------------------------------------------------------------------------------------------------------------------------------------------|
| <i>CC2D2B</i><br>NM_001159747 | c.A190G<br>missense | no                                   | no                                | no                                                    | The function of <i>CC2D2B</i> , especially in cancer, is virtually unknown; <i>CC2D2B</i> is a top upregulated gene in papillary thyroid carcinomas (Schulten <i>et al</i> , 2016). |
|                               | c.T818A<br>missense |                                      |                                   | no                                                    |                                                                                                                                                                                     |

**Notes:** <sup>a</sup> Mouse model sourced from <http://www.informatics.jax.org/>

<sup>b</sup> OMIM, online Mendelian inheritance in man, <https://www.ncbi.nlm.nih.gov/omim>

<sup>c</sup> ClinVar database, <https://www.ncbi.nlm.nih.gov/clinvar/>

Human genome assembly used in this analysis was Genome Reference Consortium GRCh37(hg19).

**Appendix Table S13. Variant filtering based on De novo model**

| Steps for filtering variants                                                                                                                                                                                                                                                | The nuclear family<br>(III.4, III.5, IV.3, and Patient IV.4) |
|-----------------------------------------------------------------------------------------------------------------------------------------------------------------------------------------------------------------------------------------------------------------------------|--------------------------------------------------------------|
| Total number of SNPs/indels after quality control and coverage.                                                                                                                                                                                                             | 4.88 million                                                 |
| Number of SNPs/Indels for model                                                                                                                                                                                                                                             | 17 129                                                       |
| Number of non-synonymous or frameshift (deletion/insertion) SNPs/Indels in exons or splicing sites.                                                                                                                                                                         | 29                                                           |
| Rare (1) non-synonymous or frameshift (deletion/insertion) SNPs/Indels in exons or splicing sites.                                                                                                                                                                          | 5                                                            |
| Rare (1) non-synonymous or frameshift (deletion/insertion) SNPs/Indels in exons or splicing sites were predicted as “damaging” with PolyPhen-2 ( <a href="#">Adzhubei et al., 2010</a> ) or “disease-causing” with MutationTaster ( <a href="#">Schwarz et al., 2014</a> ). | 0                                                            |

**Notes:** (1) The minor allele frequency (MAF) of rare variant less than 0.01 (1%) ([Merico et al., 2015](#)). MAF sourced from the Asian cohort in Exome Aggregation Consortium (ExAC) database ([Lek et al., 2016](#)) and/or 1000 Genomes database ([Abecasis et al., 2010](#)). Human genome assembly used in this analysis was Genome Reference Consortium GRCh37(hg19).

**Appendix Table S14. Variant filtering based on dominant inheritance model**

| Steps for filtering variants                                                                                                                                                                                                                                                    | The nuclear family<br>(III.4, III.5, IV.3, and Patient IV.4) |
|---------------------------------------------------------------------------------------------------------------------------------------------------------------------------------------------------------------------------------------------------------------------------------|--------------------------------------------------------------|
| Total number of SNPs/Indels after quality control and coverage.                                                                                                                                                                                                                 | -                                                            |
| Number of SNPs/Indels for model                                                                                                                                                                                                                                                 | -                                                            |
| Number of non-synonymous or frameshift (deletion/insertion) SNPs/Indels in exons or splicing sites.                                                                                                                                                                             | -                                                            |
| Rare (1) non-synonymous or frameshift (deletion/insertion) SNPs/Indels in exons or splicing sites.                                                                                                                                                                              | -                                                            |
| Rare (1) and non-synonymous or frameshift (deletion/insertion) SNPs/Indels in exons or splicing sites were predicted as “damaging” with PolyPhen-2 ( <a href="#">Adzhubei et al., 2010</a> ) or “disease-causing” with MutationTaster ( <a href="#">Schwarz et al., 2014</a> ). | -                                                            |

**Notes:** (1) The minor allele frequency (MAF) of rare variant less than 0.01 (1%) ([Merico et al., 2015](#)). MAF sourced from the Asian cohort in Exome Aggregation Consortium (ExAC) database ([Lek et al., 2016](#)) and/or 1000 Genomes database ([Abecasis et al., 2010](#)). Human genome assembly used in this analysis was Genome Reference Consortium GRCh37(hg19).

**Appendix Table S15. Serum biochemistry of *Sema7A*<sup>R145W</sup> mutant mice (4-week-old)**

|                               | Wild type (n=4) | Heterozygote (n=5) | Homozygote (n=5)                  |
|-------------------------------|-----------------|--------------------|-----------------------------------|
| <b>Gender (Male / Female)</b> | 2/2             | 3/2                | 2/3                               |
| <b>Serum ALT (IU/L)</b>       | 22.60±4.59      | 23.36±3.46         | 37.92±11.81*,#                    |
| <b>Serum AST (IU/L)</b>       | 97.20±29.26     | 124.80±28.76       | 170.72±65.18 <sup>*(0.067)</sup>  |
| <b>Serum ALP (IU/L)</b>       | 278.00±36.00    | 267.20±41.03       | 304.00±43.08                      |
| <b>Serum TBA (μmol/L)</b>     | 3.70±2.62       | 3.58±1.75          | 9.54±4.67 <sup>*(0.062)</sup> , # |
| <b>Serum TBIL (μmol/L)</b>    | 8.40±3.05       | 6.69±4.95          | 8.91±2.83                         |
| <b>Serum DBIL (μmol/L)</b>    | 5.42±1.88       | 4.16±4.18          | 5.63±1.63                         |

**Notes:** Values are mean ± SD. \**P* < 0.05 versus the WT mice, #*P* < 0.05 versus the heterozygote mutant mice. The data were analyzed by the independent-samples Student's *t*-test.

**Abbreviations:** ALT, alanine aminotransferase; AST, aspartate aminotransferase; ALP, alkaline phosphatase; TBA, total bile acids; TBIL, total bilirubin; DBIL, direct bilirubin.

**Appendix Table S16. LC-MS/MS analysis of bile acids in *Sema7a*<sup>R145W</sup> mutant mouse livers**

|                                    | Wild type (n = 5)   | Heterozygote (n = 5)  | Homozygote (n = 5)      |
|------------------------------------|---------------------|-----------------------|-------------------------|
| Taurocholic acid (TCA)             | 154870.65 ±95237.73 | 293970.65 ±68121.16*  | 512596.59 ±139355.52*,# |
| Tauromuricholic acid (TMCA)        | 4301.90 ±3837.45    | 32405.68 ±21228.12*   | 73559.29 ±40057.31*     |
| Taurodeoxycholic acid (TDCA)       | 6406.14 ±3728.14    | 4141.65 ±1438.89      | 7975.04 ±2677.18#       |
| Taurochenodeoxycholic acid (TCDCA) | 3590.60 ±2389.83    | 150752.03 ±315159.52* | 157225.77 ±135314.00*   |
| Taurohyodeoxycholic acid (THDCA)   | 213.27 ±187.24      | 1911.45 ±1611.67*     | 6026.29 ±4735.07*       |
| Taurolithocholic acid (TLCA)       | 145.66 ±142.34      | 85.99 ±44.23          | 239.56 ±129.62#         |

**Notes:** Values are mean ± SD (ng/g of liver). \* $P < 0.05$  versus the WT mice, # $P < 0.05$  versus the heterozygous mutant mice. The data were analyzed by the independent-samples Student's  $t$ -test or the Mann-Whitney  $U$  test when applicable.

**Appendix Table S17. The sequences of real time qPCR probes (TaqMan) and primers (SYBR)**

| Gene                     | Sequences (5'→3')                                                              | Species/Source                       |
|--------------------------|--------------------------------------------------------------------------------|--------------------------------------|
| <i>Bsep (Abcb11)</i>     | Proprietary to ABI                                                             | Mouse/Mm00445168_m1                  |
| <i>Mrp2 (Abcc2)</i>      | Proprietary to ABI                                                             | Mouse/Mm00496899_m1                  |
| <i>Mdr1b (Abcb1b)</i>    | Proprietary to ABI                                                             | Mouse/Mm 00440736_m1                 |
| <i>Mdr2 (Abcb4)</i>      | Proprietary to ABI                                                             | Mouse/Mm00435630_m1                  |
| <i>Abcg5</i>             | Proprietary to ABI                                                             | Mouse/Mm00446241_m1                  |
| <i>Abcg8</i>             | Proprietary to ABI                                                             | Mouse/Mm00445980_m1                  |
| <i>Mrp3 (Abcc3)</i>      | Proprietary to ABI                                                             | Mouse/Mm00551550_m1                  |
| <i>Mrp4 (Abcc4)</i>      | Proprietary to ABI                                                             | Mouse/Mm01226381_m1                  |
| <i>Ostβ (Slc51b)</i>     | Proprietary to ABI                                                             | Mouse/Mm01175040_m1                  |
| <i>Ntcp (Slc10a1)</i>    | Proprietary to ABI                                                             | Mouse/Mm00441421_m1                  |
| <i>Oatp1a1 (Slco1a1)</i> | Proprietary to ABI                                                             | Mouse/Mm01267415_m1                  |
| <i>Cyp7a1</i>            | Proprietary to ABI                                                             | Mouse/Mm00484150_m1                  |
| <i>Cyp7b1</i>            | Proprietary to ABI                                                             | Mouse/Mm00484157_m1                  |
| <i>Cyp8b1</i>            | Proprietary to ABI                                                             | Mouse/Mm00501637_s1                  |
| <i>Cyp27a1</i>           | Proprietary to ABI                                                             | Mouse/Mm00470430_m1                  |
| <i>Gapdh</i>             | Proprietary to ABI                                                             | Mouse/Mm99999915_g1                  |
| <i>Gapdh</i>             | Forward: 5'-CTTTGTCAAGCTCATTTCTGG-3'<br>Reverse: 5'-TCTTGCTCAGTGCCTTGC-3'      | Mouse/ Primers (SYBR)<br>NM_008084.3 |
| <i>Cyp2c70</i>           | Forward: 5'-TTGACCAGGGAGATGAGTTTTC-3'<br>Reverse: 5'-CCCCATAGACCTTAAGACCATG-3' | Mouse/ Primers (SYBR)<br>NM_145499.2 |

**Appendix Table S18. Antibodies used in western blot, immunohistochemistry and multiplex immunofluorescence**

| Protein                   | Host   | Company / Catalog                    | Antibody dilution |
|---------------------------|--------|--------------------------------------|-------------------|
| Gapdh                     | Rabbit | Proteintech, Chicago, IL/10494-1-AP  | WB 1:3000         |
| CK19                      | Rabbit | Abcam, Cambridge, MA/ab52625         | IHC 1:50          |
| Bsep                      | Mouse  | Santa Cruz, Dallas, CA/sc-74500      | WB 1:1000         |
| Mrp2                      | Mouse  | Abcam, Cambridge, MA/ab3373          | WB 1:2000         |
| Mdr2                      | Rabbit | Invitrogen, Carlsbad, CA/PA5-78692   | WB 1:3000         |
| Mrp3                      | Mouse  | Santa Cruz, Dallas, CA/sc-5776       | WB 1:1600         |
| Mrp4                      | Rat    | Abcam, Cambridge, MA/ab15602         | WB 1:1600         |
| Ost $\alpha$              | Rabbit | Santa Cruz, Dallas, CA/sc-100078     | WB 1:2000         |
| Ost $\beta$               | Goat   | Santa Cruz, Dallas, CA/sc-163192     | WB 1:500          |
| Ntcp                      | Rabbit | Boster, Pleasanton, CA/BA1674        | WB 1:1000         |
| Cyp7a1                    | Rabbit | Santa Cruz, Dallas, CA/sc-25536      | WB 1:1000         |
| Cyp8b1                    | Goat   | Santa Cruz, Dallas, CA/sc-23515      | WB 1:2000         |
| p-PKC $\delta$ (pS299)    | Rabbit | Epitomics, Burlingame, CA/5488-S     | WB 1:5000         |
| PKC $\delta$ (C-20)       | Rabbit | Santa Cruz, Dallas, CA/sc-937        | WB 1:2000         |
| p-PKC $\epsilon$ (Ser729) | Rabbit | Bioss Antibodies, Woburn, MA/bs-6948 | WB 1:1000         |
| PKC $\epsilon$ (C-15)     | Rabbit | Santa Cruz, Dallas, CA/sc-214        | WB 1:2000         |
| Bsep                      | Rabbit | Proteintech, Chicago, IL/18990-1-AP  | IF 1:100          |
| Mrp2                      | Rabbit | LifeSpan, Seattle, WA/LS-B1428       | IF 1:50           |
