# Supplementary material for: A homozygous R148W mutation in Semaphorin 7A causes progressive familial intrahepatic cholestasis
Source: PubMed Central journal article supplement (PMC8573601; doi:10.15252/emmm.202114563), 2021-09-29
Supplement: EMMM-13-e14563-s005.pdf [file EMMM-13-e14563-s005.pdf]

## Expanded View Figures

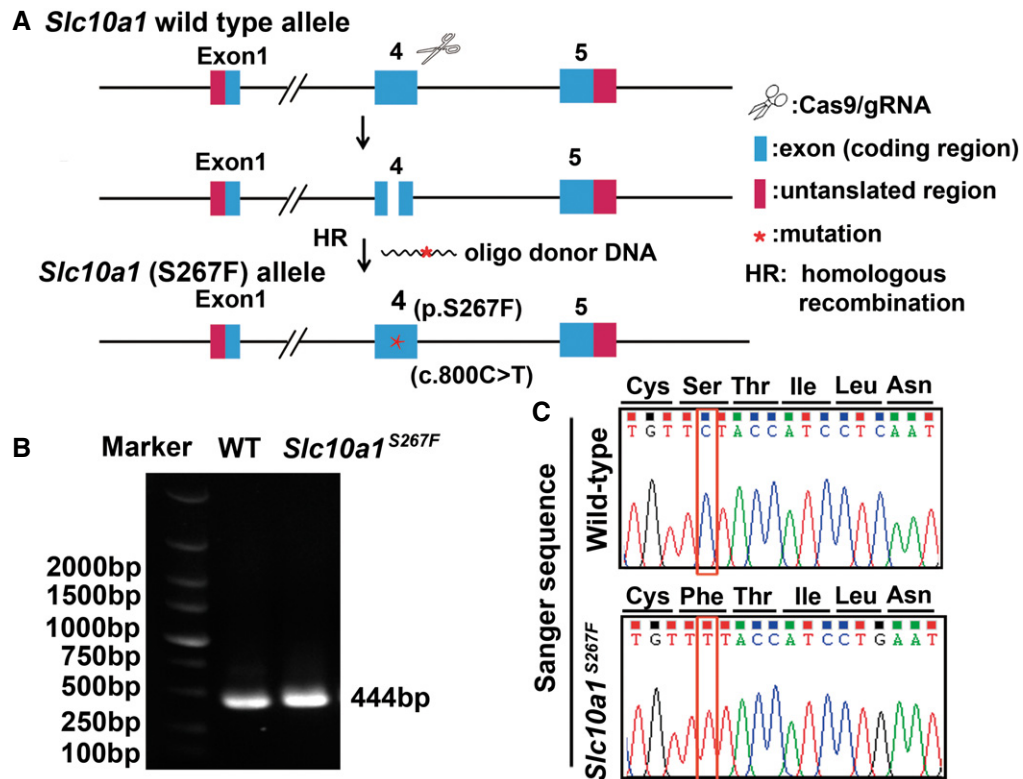

**Figure EV1.** Generation and characterization of *Slc10a1*<sup>S267F</sup> mutant mice.

A Schematic diagram for the generation of *Slc10a1*<sup>S267F</sup> mutant mice.

B Genotyping of *Slc10a1*<sup>S267F</sup> mutant mice. Genomic DNA was extracted from mouse tails, and the specific region covering the mutation was amplified by PCR.

C Identification of *Slc10a1*<sup>S267F</sup> homozygous mice by Sanger sequencing analysis.

Source data are available online for this figure.

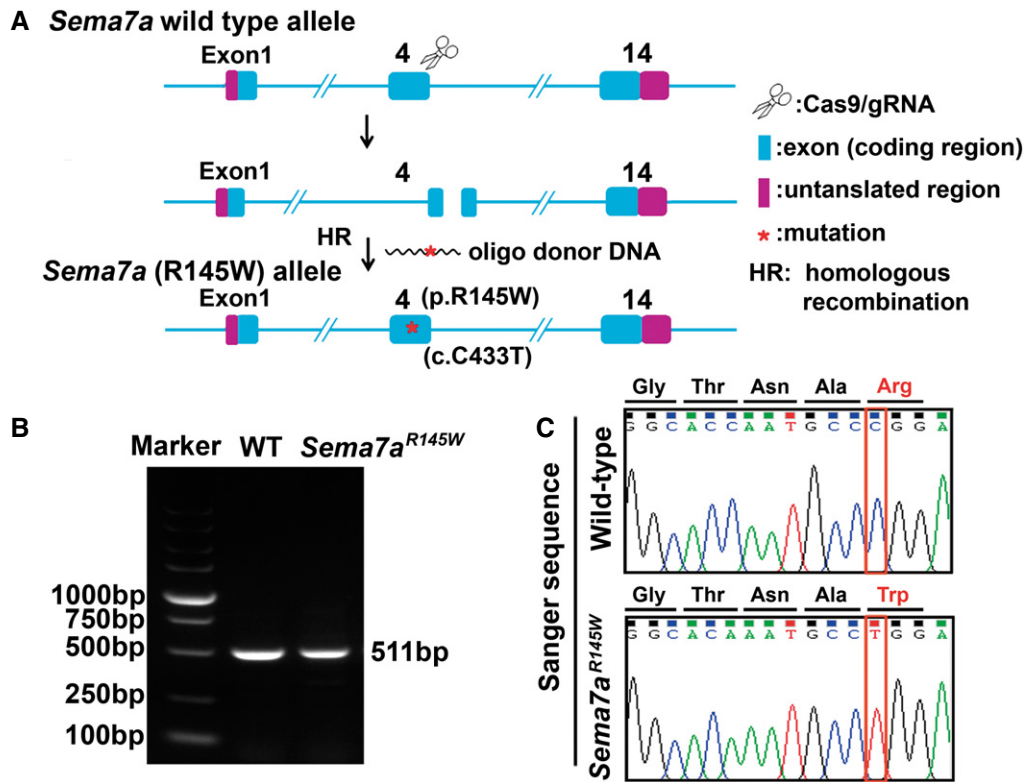

**Figure EV2. Generation and characterization of *Sema7a*<sup>R145W</sup> mutant mice.**

A Schematic diagram for the generation of *Sema7a*<sup>R145W</sup> mutant mice.

B Genotyping *Sema7a*<sup>R145W</sup> mutant mice. Genomic DNA was extracted from mouse tails, and the specific region was amplified by PCR.

C Identification of *Sema7a*<sup>R145W</sup> homozygous mice by Sanger sequencing analysis.

Source data are available online for this figure.

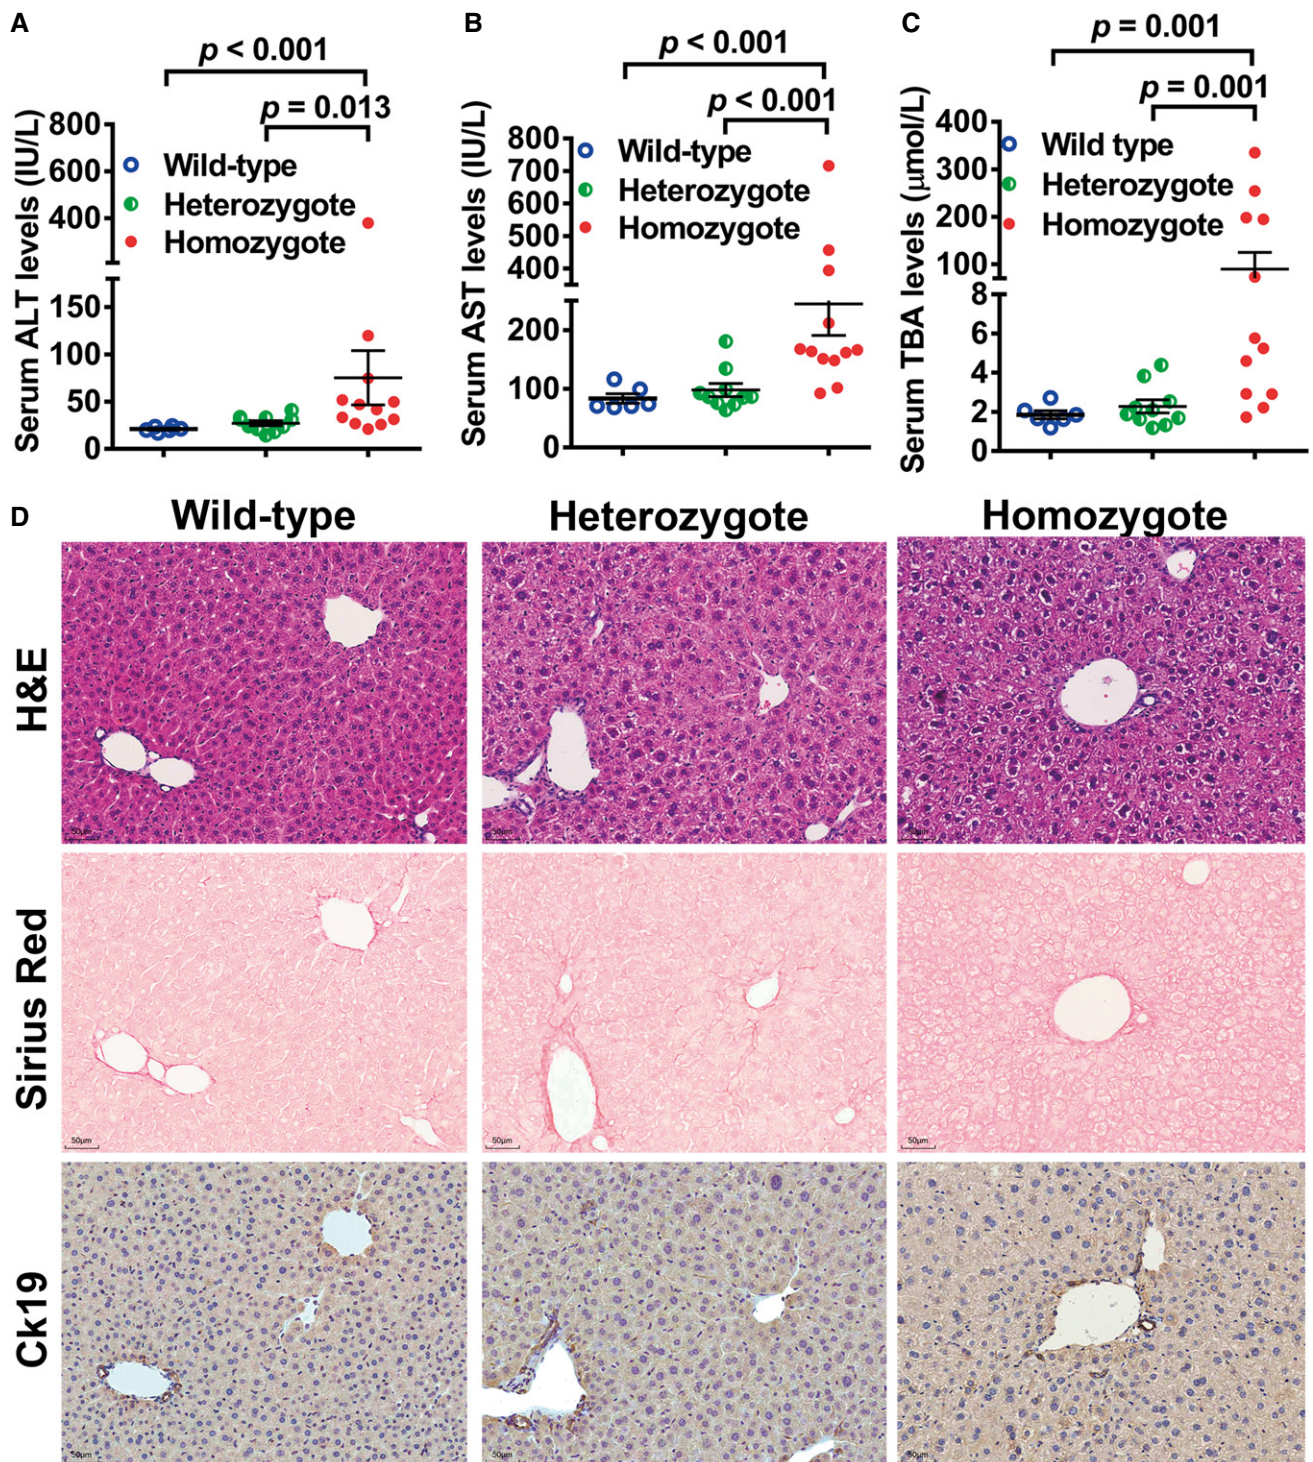

Figure EV3.



**Figure EV3. A *Sema7a*<sup>R145W</sup> homozygous mutation causes the elevated serum ALT, AST, and TBA levels and remarkable hydropic degeneration in mouse livers.**

A–C Serum ALT, AST, and TBA in *Sema7a*<sup>R145W</sup> WT ( $n = 6$ , two male/four female), heterozygous ( $n = 10$ , six male/four female) and homozygous mice ( $n = 12$ , seven male/five female). Data are shown as means  $\pm$  SD.

D Representative images of H&E staining, *Sirius Red* staining, and IHC analysis of CK19 expression in WT, *Sema7a*<sup>R145W</sup> heterozygous and homozygous mice. The *Sema7a*<sup>R145W</sup> homozygous mutation caused significant liver injury with elevated levels of serum ALT, AST, and TBA and striking hydropic degeneration in hepatocytes. Scale bar, 50  $\mu$ m.

Data information: The data were analyzed by the Mann–Whitney *U*-test.

Source data are available online for this figure.

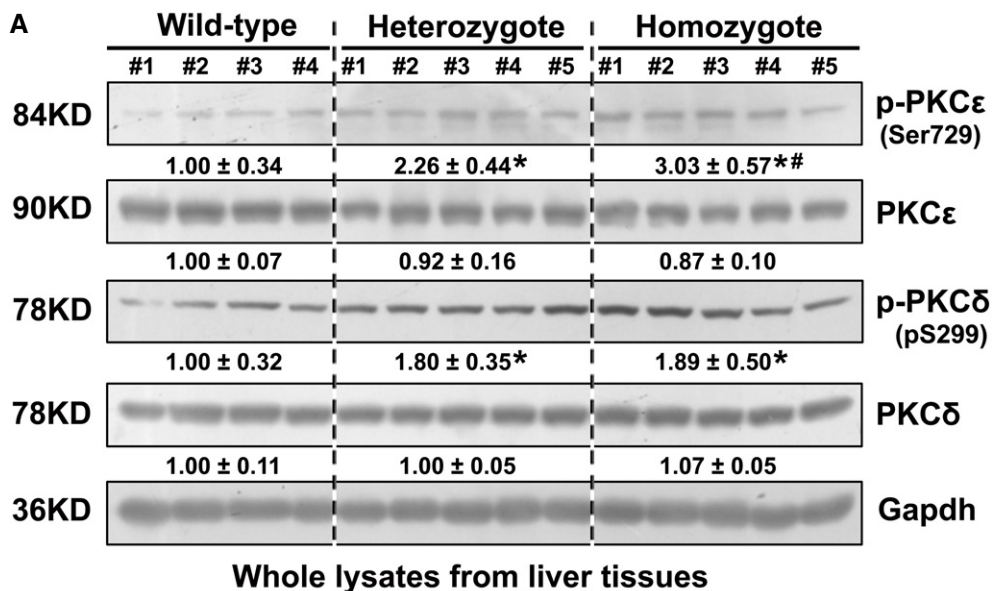

**B Primary mouse hepatocytes**

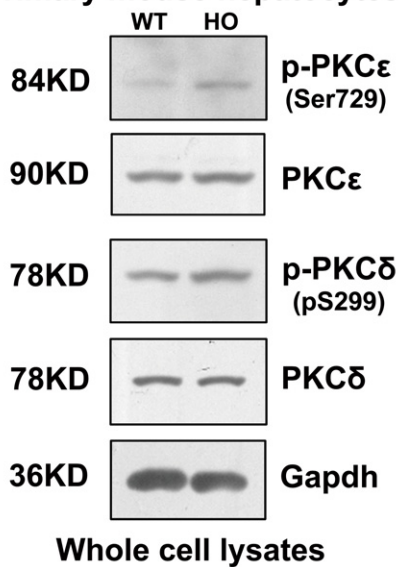

**C Transfected HepG2 cells**

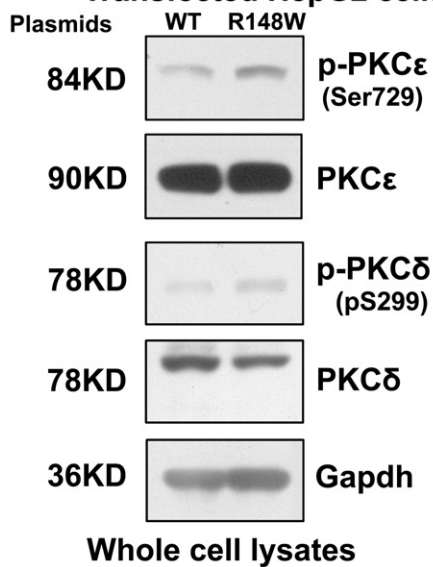

Figure EV4.

**Figure EV4. The *Sema7a*<sup>R145W</sup> mutation increases PKCδ/ε phosphorylation in hepatocytes.**

- A The levels of hepatic PKCδ/ε phosphorylation were significantly higher in *Sema7a*<sup>R145W</sup> homozygous mice than in heterozygous mice and WT mice. Wild type, wild-type mice,  $n = 4$ ; Heterozygote, *Sema7a*<sup>R145W</sup> heterozygous mice,  $n = 5$ ; homozygote, *Sema7a*<sup>R145W</sup> homozygous mice,  $n = 5$ . \* $P < 0.05$  versus the WT mice, # $P < 0.05$  versus the heterozygous mutant mice. The data were analyzed by the independent-samples Student's *t*-test and the Mann–Whitney *U*-test.
- B, C Furthermore, *Sema7a*<sup>R145W</sup> (human R148W) homozygous mutation increased PKCδ/ε phosphorylation in *Sema7a*<sup>R145W</sup> mouse primary hepatocytes (B) and human HepG2 cells following transfection with SEMA7A\_R148W construct (C).

Source data are available online for this figure.
